# Supplementary material for: Comprehensive Raman study of orthorhombic κ/ε-Ga2O3and the impact of rotational domains
Source: Royal Society of Chemistry journal article supplement (doi:10.1039/d1tc03500b), 2021-01-01
Supplement: d1tc03500b1.pdf [file d1tc03500b1.pdf]

Comprehensive Raman study of orthorhombic  $\kappa/\varepsilon - \text{Ga}_2\text{O}_3$  and the impact of rotational domains

## Supplementary Material: Comprehensive Raman study of orthorhombic $\kappa/\varepsilon - \text{Ga}_2\text{O}_3$ and the impact of rotational domains

B. M. Janzen,<sup>1</sup> P. Mazzolini,<sup>2</sup> R. Gillen,<sup>3</sup> V. F. S. Peltason,<sup>1</sup> L. P. Grote,<sup>1</sup> J. Maultzsch,<sup>3</sup> R. Fornari,<sup>2</sup> O. Bierwagen,<sup>4</sup> and M. R. Wagner<sup>1, a)</sup>

<sup>1)</sup>*Technische Universität Berlin, Institute of Solid State Physics, Hardenbergstraße 36, 10623 Berlin, Germany.*

<sup>2)</sup>*Department of Mathematical, Physical and Computer Sciences, University of Parma, Viale delle Scienze 7/A, 43124 Parma, Italy.*

<sup>3)</sup>*Chair of Experimental Physics, Friedrich-Alexander Universität Erlangen-Nürnberg, Staudtstraße 7, 91058 Erlangen, Germany.*

<sup>4)</sup>*Paul-Drude-Institut für Festkörperelektronik, Leibniz-Institut im Forschungsverbund Berlin e.V, Hausvogteiplatz 5-7, 10117 Berlin, Germany.*

<sup>a)</sup>*Electronic mail: markus.wagner@physik.tu-berlin.de*

The SI contains the atomic geometry, polarized Raman spectra illustrating the allocation of experimental and calculated Raman frequencies as well as the calculated phonon dispersion of  $\kappa\text{-Ga}_2\text{O}_3$ .

### ATOMIC GEOMETRY OF THE ORTHORHOMBIC $\kappa$ -POLYMORPH

This section provides an overview of the initial and optimized geometries utilized in our calculations.

#### Initial geometry

The atomic positions and lattice parameter for the initial geometry were taken from Ref. 1.

Lattice vectors (in Å)  
 $\vec{a}_1$ : 5.0463 0.0000 0.0000  
 $\vec{a}_2$ : 0.0000 8.7021 0.0000  
 $\vec{a}_3$ : 0.0000 0.0000 9.2833

Atomic positions of the initial geometry in coordinates of the lattice vectors,  $\vec{r}=r_1\vec{a}_1 + r_2\vec{a}_2 + r_3\vec{a}_3$ .

| Atom | $r_1$        | $r_2$        | $r_3$        |
|------|--------------|--------------|--------------|
| O    | 0.350699991  | 0.492300004  | 0.137400001  |
| O    | -0.016899999 | 0.494300008  | -0.093400002 |
| O    | 0.335599989  | 0.154300004  | 0.150399998  |
| O    | 0.847599983  | 0.670400023  | 0.169400007  |
| O    | 0.000899999  | 0.829299986  | 0.409399986  |
| O    | 0.508099973  | 0.666299999  | -0.097400002 |
| O    | -0.350699991 | -0.492300004 | 0.637400001  |
| O    | 0.016899999  | -0.494300008 | 0.406599998  |
| O    | -0.335599989 | -0.154300004 | 0.650399998  |
| O    | -0.847599983 | -0.670400023 | 0.669400007  |
| O    | -0.000899999 | -0.829299986 | 0.909399986  |
| O    | -0.508099973 | -0.666299999 | 0.402599998  |
| O    | 0.850699991  | 0.007699996  | 0.137400001  |
| O    | 0.483100000  | 0.005699992  | -0.093400002 |
| O    | 0.835599989  | 0.345699996  | 0.150399998  |
| O    | 1.347599983  | -0.170400023 | 0.169400007  |
| O    | 0.500899999  | -0.329299986 | 0.409399986  |
| O    | 1.008099973  | -0.166299999 | -0.097400002 |
| O    | 0.149300009  | 0.992300004  | 0.637400001  |
| O    | 0.516899999  | 0.994300008  | 0.406599998  |
| O    | 0.164400011  | 0.654300004  | 0.650399998  |
| O    | -0.347599983 | 1.170400023  | 0.669400007  |
| O    | 0.499100000  | 1.329299986  | 0.909399986  |
| O    | -0.008099973 | 1.166299999  | 0.402599998  |
| Ga   | 0.183889999  | 0.339839995  | 0.027850000  |
| Ga   | 0.675490022  | 0.530449986  | 0.036959998  |
| Ga   | 0.189109996  | 0.652779996  | 0.250349998  |
| Ga   | 0.174209997  | 0.652989984  | -0.160760000 |
| Ga   | -0.183889999 | -0.339839995 | 0.527850000  |
| Ga   | -0.675490022 | -0.530449986 | 0.536959998  |
| Ga   | -0.189109996 | -0.652779996 | 0.750349998  |
| Ga   | -0.174209997 | -0.652989984 | 0.339239999  |
| Ga   | 0.683889999  | 0.160160005  | 0.027850000  |
| Ga   | 1.175490022  | -0.030449986 | 0.036959998  |
| Ga   | 0.689109996  | -0.152779996 | 0.250349998  |
| Ga   | 0.674209997  | -0.152989984 | -0.160760000 |
| Ga   | 0.316110000  | 0.839839995  | 0.527850000  |
| Ga   | -0.175490022 | 1.030449986  | 0.536959998  |
| Ga   | 0.310890004  | 1.152779996  | 0.750349998  |
| Ga   | 0.325790003  | 1.152989984  | 0.339239999  |

### Optimized geometry

Lattice vectors (in Å)  
 $\vec{a}_1$ : 5.0283 0.0000 0.0000  
 $\vec{a}_2$ : 0.0000 8.6209 0.0000  
 $\vec{a}_3$ : 0.0000 0.0000 9.2114

Atomic positions of the optimized geometry in coordinates of the lattice vectors,  $\vec{r}=r_1\vec{a}_1 + r_2\vec{a}_2 + r_3\vec{a}_3$ .

| Atom | $r_1$        | $r_2$        | $r_3$        |
|------|--------------|--------------|--------------|
| O    | 0.348954271  | 0.497226135  | 0.136524530  |
| O    | -0.022817242 | 0.487498102  | -0.094069859 |
| O    | 0.345266653  | 0.158817606  | 0.140978434  |
| O    | 0.849127984  | 0.671268259  | 0.167206320  |
| O    | -0.026463084 | 0.825286183  | 0.411794904  |
| O    | 0.521691793  | 0.666647694  | -0.099267436 |
| O    | -0.348954271 | -0.497226135 | 0.636524530  |
| O    | 0.022817242  | -0.487498102 | 0.405930141  |
| O    | -0.345266653 | -0.158817606 | 0.640978434  |
| O    | -0.849127984 | -0.671268259 | 0.667206320  |
| O    | 0.026463084  | -0.825286183 | 0.911794904  |
| O    | -0.521691793 | -0.666647694 | 0.400732564  |
| O    | 0.848954271  | 0.002773865  | 0.136524530  |
| O    | 0.477182758  | 0.012501898  | -0.094069859 |
| O    | 0.845266653  | 0.341182394  | 0.140978434  |
| O    | 0.349127984  | -0.171268259 | 0.167206320  |
| O    | 0.473536916  | -0.325286183 | 0.411794904  |
| O    | 0.021691793  | -0.166647694 | -0.099267436 |
| O    | 0.151045729  | 0.997226135  | 0.636524530  |
| O    | 0.522817242  | 0.987498102  | 0.405930141  |
| O    | 0.154733347  | 0.658817606  | 0.640978434  |
| O    | -0.349127984 | 0.171268259  | 0.667206320  |
| O    | 0.526463084  | 0.325286183  | 0.911794904  |
| O    | -0.021691793 | 0.166647694  | 0.400732564  |
| Ga   | 0.186596894  | 0.338109577  | 0.029961599  |
| Ga   | 0.677921005  | 0.531046505  | 0.043366267  |
| Ga   | 0.191108026  | 0.650828560  | 0.252211163  |
| Ga   | 0.178685369  | 0.651661312  | -0.158505938 |
| Ga   | -0.186596894 | -0.338109577 | 0.529961599  |
| Ga   | -0.677921005 | -0.531046505 | 0.543366267  |
| Ga   | -0.191108026 | -0.650828560 | 0.752211163  |
| Ga   | -0.178685369 | -0.651661312 | 0.341494062  |
| Ga   | 0.686596894  | 0.161890423  | 0.029961599  |
| Ga   | 0.177921005  | -0.031046505 | 0.043366267  |
| Ga   | 0.691108026  | -0.150828560 | 0.252211163  |
| Ga   | 0.678685369  | -0.151661312 | -0.158505938 |
| Ga   | 0.313403106  | 0.838109577  | 0.529961599  |
| Ga   | -0.177921005 | 0.031046505  | 0.543366267  |
| Ga   | 0.308891974  | 0.150828560  | 0.752211163  |
| Ga   | 0.321314631  | 0.151661312  | 0.341494062  |

## **POLARIZED RAMAN SPECTRA**

Fig. S1 illustrates the experimental Raman spectra (black lines) from Fig. 4 corresponding to the calculated (magenta lines) Raman spectra and mode intensities (magenta bars) predicted for the orthorhombic crystal structure. Raman frequencies of all experimentally determined modes are listed in Table 4 in conjunction with their theoretical counterparts.

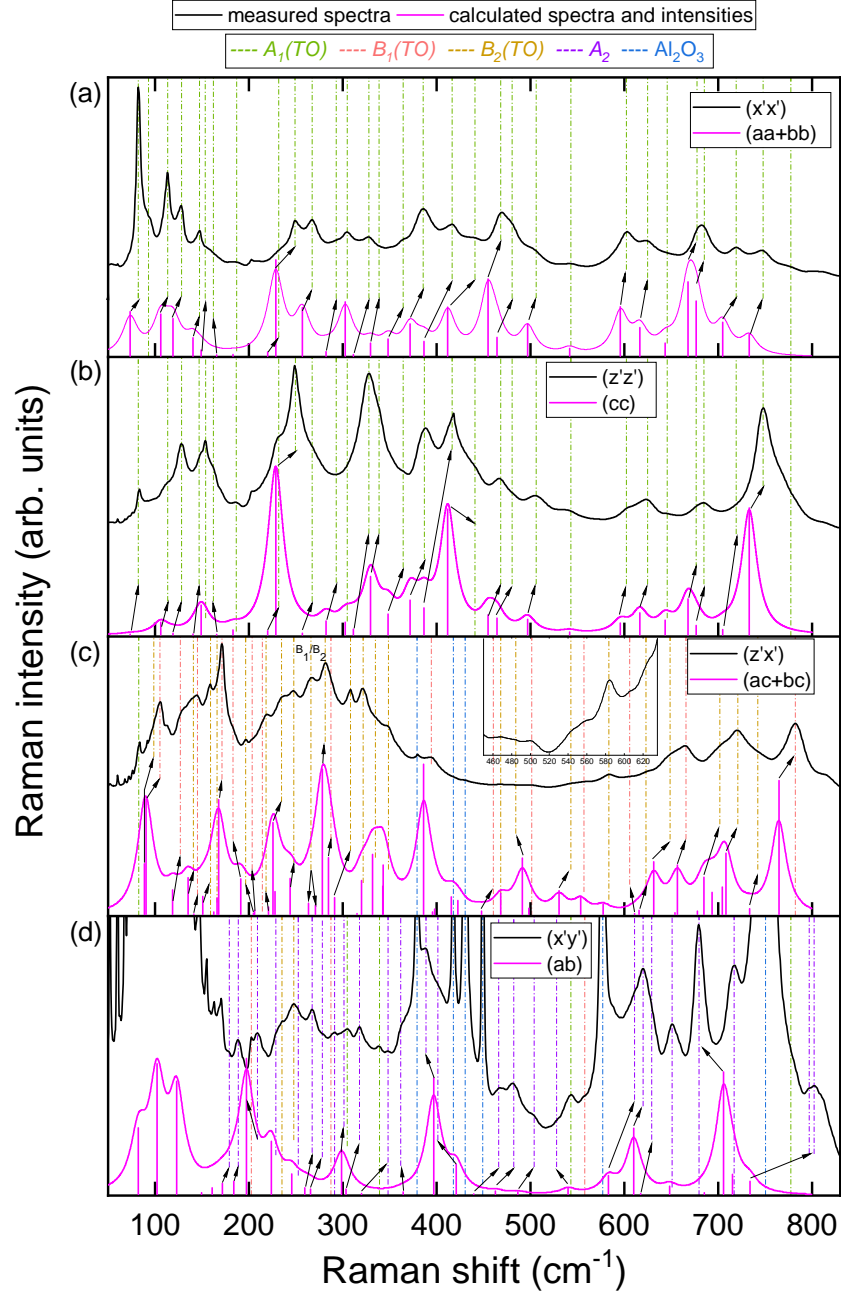

**FIGURE S1.** Raman spectra of the MBE-grown  $\kappa$ -Ga<sub>2</sub>O<sub>3</sub> thin film on (0001)-oriented Al<sub>2</sub>O<sub>3</sub>. **a)** Raman spectra in parallel polarization for excitation on the edge. The Cartesian coordinate system  $x', y', z'$  is chosen such that  $z'$ -axis aligns with the [001] direction, with the  $x'$  and  $y'$  directions oriented according to Fig. 3. In the  $y'(x'x')\bar{y}'$  configuration, the polarization vectors are aligned along the excited edge. Mode symmetries of Raman peaks associated with the  $\kappa$ -Ga<sub>2</sub>O<sub>3</sub> thin film or sapphire substrate are indicated by vertical dashed lines. A respective line's color denotes the vibrational mode symmetry as provided on top of the graphs. Experimental modes are correlated with their calculated (magenta) counterparts. Where necessary the correlation is indicated using black arrows. **b)** Raman spectra in parallel polarization with polarization vectors aligned along the  $z' \parallel c$  axis. **c)** Raman spectra of the edge in crossed polarization, with the incident or scattered light aligning with the [001] or  $x'$  directions. The inset depicts the spectrum between 450 and 640  $\text{cm}^{-1}$  with magnified y-scale.  $B_1(TO)$  and  $B_2(TO)$  modes are labeled based on their correlation to the calculated Raman frequencies as explained in the text. **d)** Confocal Raman spectra in crossed polarization. The spectrum is multiplied by a constant factor to magnify low-intensity modes.

## PHONON DISPERSION OF THE $\kappa$ -POLYMORPH

Fig. S2 shows the calculated phonon dispersion of orthorhombic  $\kappa$ -Ga<sub>2</sub>O<sub>3</sub> along a path between selected high symmetry points in the Brillouin zone and the phonon density-of-states (phDOS). We explicitly calculated the vibrations on a discrete grid of 6x4x4 phonon wavevectors and then obtained the phonon dispersion along the desired path through Fourier interpolation. For the phDOS, we interpolated the dispersion onto a finer discrete grid of 20x12x12 q-points and used a Gaussian broadening of the peaks with a FWHM of 0.1 cm<sup>-1</sup>. We refer to the main text for the computational parameters used for the groundstate and general phonon calculations.

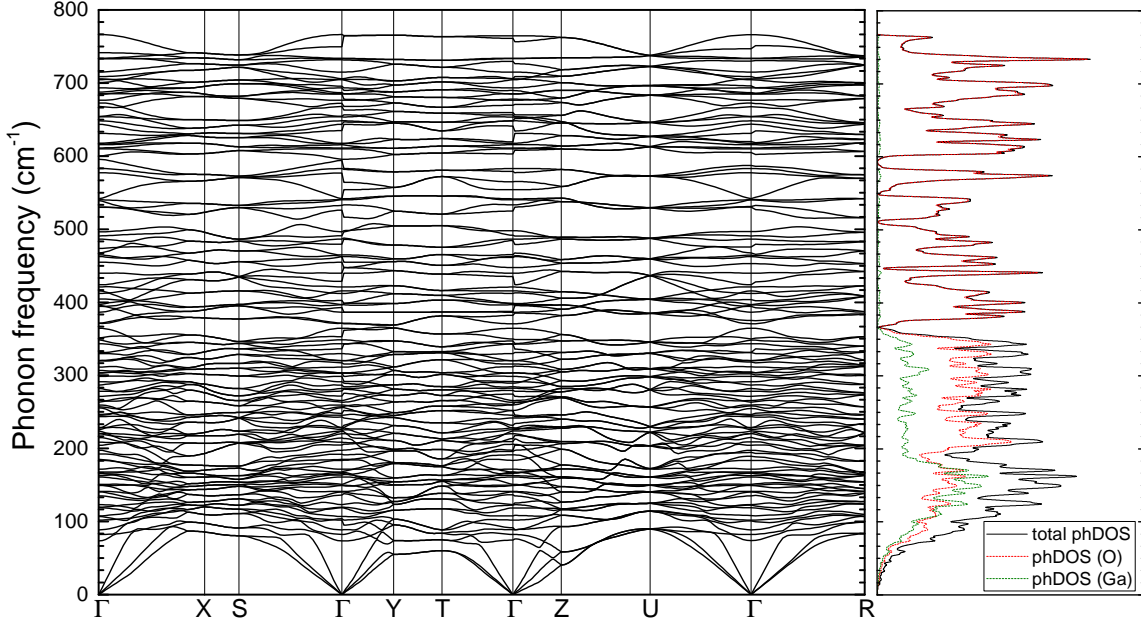

**FIGURE S2.** Left: Calculated phonon dispersion of  $\kappa$ -Ga<sub>2</sub>O<sub>3</sub>. The labels indicate high symmetry points with the following coordinates in terms of reciprocal lattice vectors:  $\Gamma \rightarrow (0.0, 0.0, 0.0)$ ,  $X \rightarrow (\frac{1}{2}, 0.0, 0.0)$ ,  $Y \rightarrow (0.0, \frac{1}{2}, 0.0)$ ,  $Z \rightarrow (0.0, 0.0, \frac{1}{2})$ ,  $S \rightarrow (\frac{1}{2}, \frac{1}{2}, 0.0)$ ,  $T \rightarrow (0.0, \frac{1}{2}, \frac{1}{2})$ ,  $U \rightarrow (\frac{1}{2}, 0.0, \frac{1}{2})$ ,  $R \rightarrow (\frac{1}{2}, \frac{1}{2}, \frac{1}{2})$ . Right: Calculated phonon density-of-states (phDOS) and partial phDOS of the contributions of the vibrations of the O and Ga atoms. The square of the phonon eigenvectors was used a weight for the calculations of the partial phDOS for the different species.

## CALCULATED RAMAN TENSOR ELEMENTS OF $\kappa$ -GA<sub>2</sub>O<sub>3</sub>

Tables S1-S3 list the calculated Raman tensor elements used for the simulation of the Raman spectra in the main text. We refer to the method part for the employed computational procedure and parameters. The labels follow the usual convention for the Raman tensor,

$$\mathcal{R} \propto \begin{pmatrix} a & d & f \\ d & b & e \\ f & e & c \end{pmatrix}.$$

**TABLE S1.** Calculated Raman tensor elements (in arb.u) and frequencies  $\omega$  (in  $\text{cm}^{-1}$ ) of the calculated phonon modes of  $\kappa\text{-Ga}_2\text{O}_3$ . For the sake of readability, we followed the convention used recently in Ref. 2 and rescaled the values obtained from our DFT calculations such that the largest Raman tensor element has value 1000. The final two columns indicate the point-group symmetry of the phonon mode and whether it is (as per point-group symmetry) Raman (R) or infrared active (I).

| Phonon mode | $\omega$ | a    | b    | c    | d    | e    | f   | Symmetry | Optical activity |
|-------------|----------|------|------|------|------|------|-----|----------|------------------|
| 1           | 73.5     | -109 | 55   | 13   | 0    | 0    | 0   | $A_1$    | I+R              |
| 2           | 82.4     | 0    | 0    | 0    | -47  | 0    | 0   | $A_2$    | R                |
| 3           | 88.8     | 0    | 0    | 0    | 0    | 49   | 0   | $B_2$    | I+R              |
| 4           | 90.2     | 0    | 0    | 0    | 0    | 0    | 75  | $B_1$    | I+R              |
| 5           | 102.1    | 0    | 0    | 0    | -80  | 0    | 0   | $A_2$    | R                |
| 6           | 106.2    | 115  | -121 | 69   | 0    | 0    | 0   | $A_1$    | I+R              |
| 7           | 118.7    | 0    | 0    | 0    | 0    | 0    | -45 | $B_1$    | I+R              |
| 8           | 119.2    | -130 | -118 | -28  | 0    | 0    | 0   | $A_1$    | I+R              |
| 9           | 123.2    | 0    | 0    | 0    | -89  | 0    | 0   | $A_2$    | R                |
| 10          | 135.0    | 0    | 0    | 0    | 0    | 61   | 0   | $B_2$    | I+R              |
| 11          | 140.6    | 109  | 89   | 23   | 0    | 0    | 0   | $A_1$    | I+R              |
| 12          | 141.1    | 0    | 0    | 0    | 0    | 0    | 8   | $B_1$    | I+R              |
| 13          | 149.3    | -64  | -57  | -144 | 0    | 0    | 0   | $A_1$    | I+R              |
| 14          | 149.7    | 0    | 0    | 0    | 11   | 0    | 0   | $A_2$    | R                |
| 15          | 151.0    | 0    | 0    | 0    | 0    | -47  | 0   | $B_2$    | I+R              |
| 16          | 161.0    | 0    | 0    | 0    | -26  | 0    | 0   | $A_2$    | R                |
| 17          | 162.5    | 0    | 0    | 0    | 0    | -18  | 0   | $B_2$    | I+R              |
| 18          | 165.6    | -39  | 1    | -21  | 0    | 0    | 0   | $A_1$    | I+R              |
| 19          | 166.1    | 0    | 0    | 0    | 0    | 49   | 0   | $B_2$    | I+R              |
| 20          | 167.7    | 0    | 0    | 0    | 0    | 0    | 131 | $B_1$    | I+R              |
| 21          | 171.6    | 0    | 0    | 0    | 37   | 0    | 0   | $A_2$    | R                |
| 22          | 182.9    | 3    | -49  | 69   | 0    | 0    | 0   | $A_1$    | I+R              |
| 23          | 183.7    | 0    | 0    | 0    | -42  | 0    | 0   | $A_2$    | R                |
| 24          | 191.2    | 0    | 0    | 0    | 0    | 0    | -81 | $B_1$    | I+R              |
| 25          | 197.5    | 0    | 0    | 0    | 147  | 0    | 0   | $A_2$    | R                |
| 26          | 204.6    | 0    | 0    | 0    | 0    | -16  | 0   | $B_2$    | I+R              |
| 27          | 206.1    | 0    | 0    | 0    | 0    | 0    | -29 | $B_1$    | I+R              |
| 28          | 213.6    | 0    | 0    | 0    | 0    | 0    | 4   | $B_1$    | I+R              |
| 29          | 220.1    | -52  | -78  | 75   | 0    | 0    | 0   | $A_1$    | I+R              |
| 30          | 221.1    | 0    | 0    | 0    | 0    | -42  | 0   | $B_2$    | I+R              |
| 31          | 223.8    | 0    | 0    | 0    | -101 | 0    | 0   | $A_2$    | R                |
| 32          | 225.7    | 0    | 0    | 0    | 0    | 150  | 0   | $B_2$    | I+R              |
| 33          | 227.6    | 0    | 0    | 0    | 0    | 0    | -75 | $B_1$    | I+R              |
| 34          | 228.6    | 358  | 339  | 493  | 0    | 0    | 0   | $A_1$    | I+R              |
| 35          | 241.3    | 0    | 0    | 0    | 0    | 0    | 5   | $B_1$    | I+R              |
| 36          | 243.8    | 0    | 0    | 0    | 0    | -100 | 0   | $B_2$    | I+R              |
| 37          | 245.5    | 0    | 0    | 0    | -68  | 0    | 0   | $A_2$    | R                |
| 38          | 251.9    | 0    | 0    | 0    | 0    | 0    | -10 | $B_1$    | I+R              |
| 39          | 257.0    | -182 | -338 | -52  | 0    | 0    | 0   | $A_1$    | I+R              |
| 40          | 259.5    | 0    | 0    | 0    | 39   | 0    | 0   | $A_2$    | R                |
| 41          | 263.3    | 0    | 0    | 0    | 0    | 0    | 59  | $B_1$    | I+R              |
| 42          | 265.7    | 0    | 0    | 0    | -35  | 0    | 0   | $A_2$    | R                |
| 43          | 270.8    | 0    | 0    | 0    | 0    | -56  | 0   | $B_2$    | I+R              |
| 44          | 278.3    | 0    | 0    | 0    | 0    | -223 | 0   | $B_2$    | I+R              |
| 45          | 282.0    | 8    | 122  | 167  | 0    | 0    | 0   | $A_1$    | I+R              |
| 46          | 284.7    | 0    | 0    | 0    | 0    | 0    | 142 | $B_1$    | I+R              |
| 47          | 289.3    | 0    | 0    | 0    | 0    | 0    | -11 | $B_1$    | I+R              |
| 48          | 291.4    | 0    | 0    | 0    | 0    | 79   | 0   | $B_2$    | I+R              |
| 49          | 298.6    | 0    | 0    | 0    | -117 | 0    | 0   | $A_2$    | R                |
| 50          | 302.7    | -319 | -336 | -167 | 0    | 0    | 0   | $A_1$    | I+R              |

TABLE S2. continuation of Tab. S1.

| Phonon mode | $\omega$ | a    | b    | c    | d    | e    | f    | Symmetry | Optical activity |
|-------------|----------|------|------|------|------|------|------|----------|------------------|
| 51          | 303.4    | 0    | 0    | 0    | 39   | 0    | 0    | $A_2$    | R                |
| 52          | 311.4    | 65   | -32  | 114  | 0    | 0    | 0    | $A_1$    | I+R              |
| 53          | 315.4    | 0    | 0    | 0    | 0    | 0    | 17   | $B_1$    | I+R              |
| 54          | 320.0    | 0    | 0    | 0    | 14   | 0    | 0    | $A_2$    | R                |
| 55          | 320.1    | 0    | 0    | 0    | 0    | 120  | 0    | $B_2$    | I+R              |
| 56          | 329.7    | 19   | 240  | 387  | 0    | 0    | 0    | $A_1$    | I+R              |
| 57          | 331.5    | 0    | 0    | 0    | 0    | -164 | 0    | $B_2$    | I+R              |
| 58          | 342.7    | 0    | 0    | 0    | 0    | 0    | -116 | $B_1$    | I+R              |
| 59          | 343.2    | 0    | 0    | 0    | 0    | -153 | 0    | $B_2$    | I+R              |
| 60          | 348.4    | 267  | 111  | 240  | 0    | 0    | 0    | $A_1$    | I+R              |
| 61          | 364.5    | 0    | 0    | 0    | 31   | 0    | 0    | $A_2$    | R                |
| 62          | 370.4    | 0    | 0    | 0    | 0    | 0    | 3    | $B_1$    | I+R              |
| 63          | 371.9    | -196 | -367 | -326 | 0    | 0    | 0    | $A_1$    | I+R              |
| 64          | 386.2    | 0    | 0    | 0    | 0    | 0    | -292 | $B_1$    | I+R              |
| 65          | 386.4    | -138 | 255  | 295  | 0    | 0    | 0    | $A_1$    | I+R              |
| 66          | 395.8    | 0    | 0    | 0    | 0    | -40  | 0    | $B_2$    | I+R              |
| 67          | 396.8    | 0    | 0    | 0    | 235  | 0    | 0    | $A_2$    | R                |
| 68          | 397.9    | 0    | 0    | 0    | 0    | 0    | -56  | $B_1$    | I+R              |
| 69          | 411.9    | 384  | 398  | 671  | 0    | 0    | 0    | $A_1$    | I+R              |
| 70          | 415.6    | 0    | 0    | 0    | 0    | -105 | 0    | $B_2$    | I+R              |
| 71          | 420.8    | 0    | 0    | 0    | -124 | 0    | 0    | $A_2$    | R                |
| 72          | 422.4    | 0    | 0    | 0    | 0    | -95  | 0    | $B_2$    | I+R              |
| 73          | 439.6    | 0    | 0    | 0    | 12   | 0    | 0    | $A_2$    | R                |
| 74          | 447.6    | 0    | 0    | 0    | 0    | 0    | -47  | $B_1$    | I+R              |
| 75          | 454.8    | -394 | -633 | -286 | 0    | 0    | 0    | $A_1$    | I+R              |
| 76          | 462.6    | 0    | 0    | 0    | 43   | 0    | 0    | $A_2$    | R                |
| 77          | 464.3    | -372 | 28   | 267  | 0    | 0    | 0    | $A_1$    | I+R              |
| 78          | 468.5    | 0    | 0    | 0    | 0    | 126  | 0    | $B_2$    | I+R              |
| 79          | 486.3    | 0    | 0    | 0    | 38   | 0    | 0    | $A_2$    | R                |
| 80          | 491.2    | 0    | 0    | 0    | 0    | 212  | 0    | $B_2$    | I+R              |
| 81          | 497.0    | 476  | 188  | 267  | 0    | 0    | 0    | $A_1$    | I+R              |
| 82          | 498.3    | 0    | 0    | 0    | 0    | 0    | -70  | $B_1$    | I+R              |
| 83          | 530.5    | 0    | 0    | 0    | 0    | 145  | 0    | $B_2$    | I+R              |
| 84          | 533.2    | 0    | 0    | 0    | 0    | 0    | -10  | $B_1$    | I+R              |
| 85          | 540.1    | 0    | 0    | 0    | -70  | 0    | 0    | $A_2$    | R                |
| 86          | 541.6    | -256 | 59   | -119 | 0    | 0    | 0    | $A_1$    | I+R              |
| 87          | 553.5    | 0    | 0    | 0    | 0    | 0    | -131 | $B_1$    | I+R              |
| 88          | 577.4    | 0    | 0    | 0    | 0    | -102 | 0    | $B_2$    | I+R              |
| 89          | 583.0    | 0    | 0    | 0    | -123 | 0    | 0    | $A_2$    | R                |
| 90          | 595.8    | -409 | -591 | -267 | 0    | 0    | 0    | $A_1$    | I+R              |
| 91          | 610.1    | 0    | 0    | 0    | 239  | 0    | 0    | $A_2$    | R                |
| 92          | 610.9    | 0    | 0    | 0    | 0    | 0    | 31   | $B_1$    | I+R              |
| 93          | 615.6    | 0    | 0    | 0    | 0    | -67  | 0    | $B_2$    | I+R              |
| 94          | 616.6    | -318 | -461 | 371  | 0    | 0    | 0    | $A_1$    | I+R              |
| 95          | 617.5    | 0    | 0    | 0    | -24  | 0    | 0    | $A_2$    | R                |
| 96          | 631.2    | 0    | 0    | 0    | 0    | -243 | 0    | $B_2$    | I+R              |
| 97          | 643.5    | 370  | 119  | 312  | 0    | 0    | 0    | $A_1$    | I+R              |
| 98          | 648.2    | 0    | 0    | 0    | 87   | 0    | 0    | $A_2$    | R                |
| 99          | 653.8    | 0    | 0    | 0    | 0    | 0    | 7    | $B_1$    | I+R              |
| 100         | 653.9    | 0    | 0    | 0    | 0    | -48  | 0    | $B_2$    | I+R              |



TABLE S3. continuation of Tab. S1.

| Phonon mode | $\omega$ | a    | b    | c    | d   | e   | f    | Symmetry | Optical activity |
|-------------|----------|------|------|------|-----|-----|------|----------|------------------|
| 101         | 656.6    | 0    | 0    | 0    | 0   | 0   | -241 | $B_1$    | I+R              |
| 102         | 667.9    | -535 | -788 | -501 | 0   | 0   | 0    | $A_1$    | I+R              |
| 103         | 676.3    | 816  | 129  | 258  | 0   | 0   | 0    | $A_1$    | I+R              |
| 104         | 677.6    | 0    | 0    | 0    | 0   | 0   | 66   | $B_1$    | I+R              |
| 105         | 684.9    | 0    | 0    | 0    | 0   | 216 | 0    | $B_2$    | I+R              |
| 106         | 685.2    | 0    | 0    | 0    | 36  | 0   | 0    | $A_2$    | R                |
| 107         | 689.7    | 0    | 0    | 0    | 0   | 0   | 0    | $B_1$    | I+R              |
| 108         | 693.4    | 0    | 0    | 0    | 0   | 168 | 0    | $B_2$    | I+R              |
| 109         | 704.4    | 0    | 0    | 0    | 0   | 0   | -189 | $B_1$    | I+R              |
| 110         | 705.0    | -363 | -559 | -198 | 0   | 0   | 0    | $A_1$    | I+R              |
| 111         | 705.6    | 0    | 0    | 0    | 359 | 0   | 0    | $A_2$    | R                |
| 112         | 708.2    | 0    | 0    | 0    | 0   | 282 | 0    | $B_2$    | I+R              |
| 113         | 715.0    | 0    | 0    | 0    | 146 | 0   | 0    | $A_2$    | R                |
| 114         | 733.1    | 197  | 505  | 999  | 0   | 0   | 0    | $A_1$    | I+R              |
| 115         | 733.4    | 0    | 0    | 0    | 0   | 88  | 0    | $B_2$    | I+R              |
| 116         | 733.8    | 0    | 0    | 0    | 120 | 0   | 0    | $A_2$    | R                |
| 117         | 764.6    | 0    | 0    | 0    | 0   | 0   | 440  | $B_1$    | I+R              |

## REFERENCES

1. I. Cora, F. Mezzadri, F. Boschi, M. Bosi, M. Čaplovičová, G. Calestani, I. Dódoný, B. Pécz, and R. Fornari, “The real structure of  $\epsilon$ - $\text{Ga}_2\text{O}_3$  and its relation to  $\kappa$ -phase,” *CrystEngComm* **19**, 1509–1516 (2017).
2. C. Kranert, C. Sturm, R. Schmidt-Grund, and M. Grundmann, “Raman tensor elements of  $\beta$ - $\text{Ga}_2\text{O}_3$ ,” *Scientific Reports* **6**, 35964 (2016).
